# Supplementary material for: Doxorubicin-loaded platelets conjugated with anti-CD22 mAbs: a novel targeted delivery system for lymphoma treatment with cardiopulmonary avoidance
Source: PubMed Central journal article supplement (PMC5601655; doi:10.18632/oncotarget.16871), 2017-04-06
Supplement: oncotarget-08-58322-s001.pdf [file oncotarget-08-58322-s001.pdf]

## Doxorubicin-loaded platelets conjugated with anti-CD22 mAbs: a novel targeted delivery system for lymphoma treatment with cardiopulmonary avoidance

### SUPPLEMENTARY FIGURES

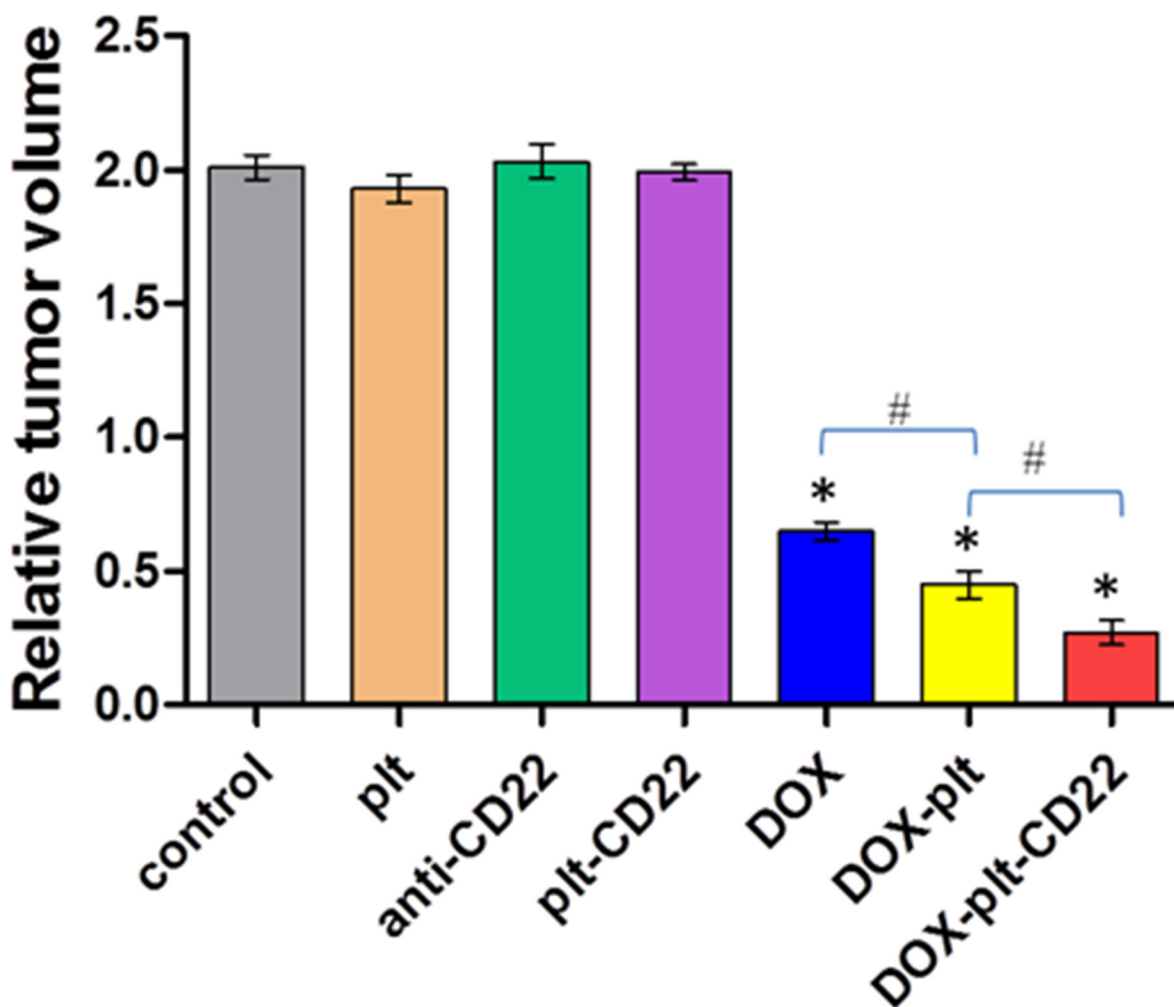

Supplementary Figure 1: The final relative volume of tumors from mice with different treatments. The final volumes of tumors from the DOX-platelet-CD22 group were smallest (\* $P < 0.05$  when compare with controls, # $P < 0.05$ ).

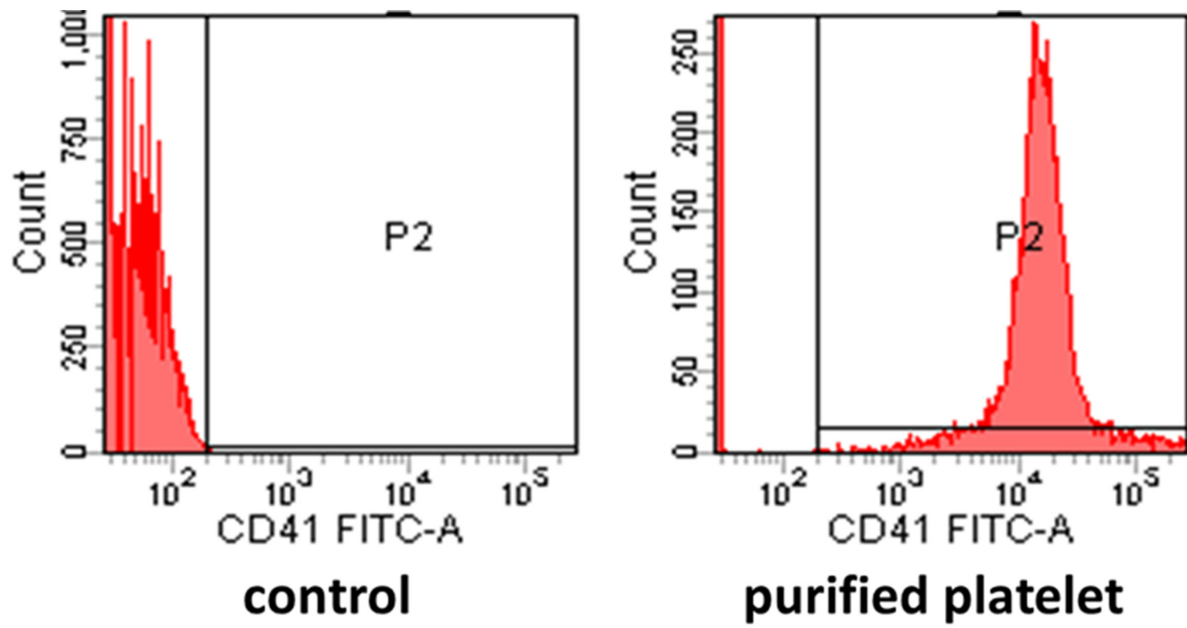

Supplementary Figure 2: Purity of platelet population detected by FCM analysis. The purity exceeds 96%.

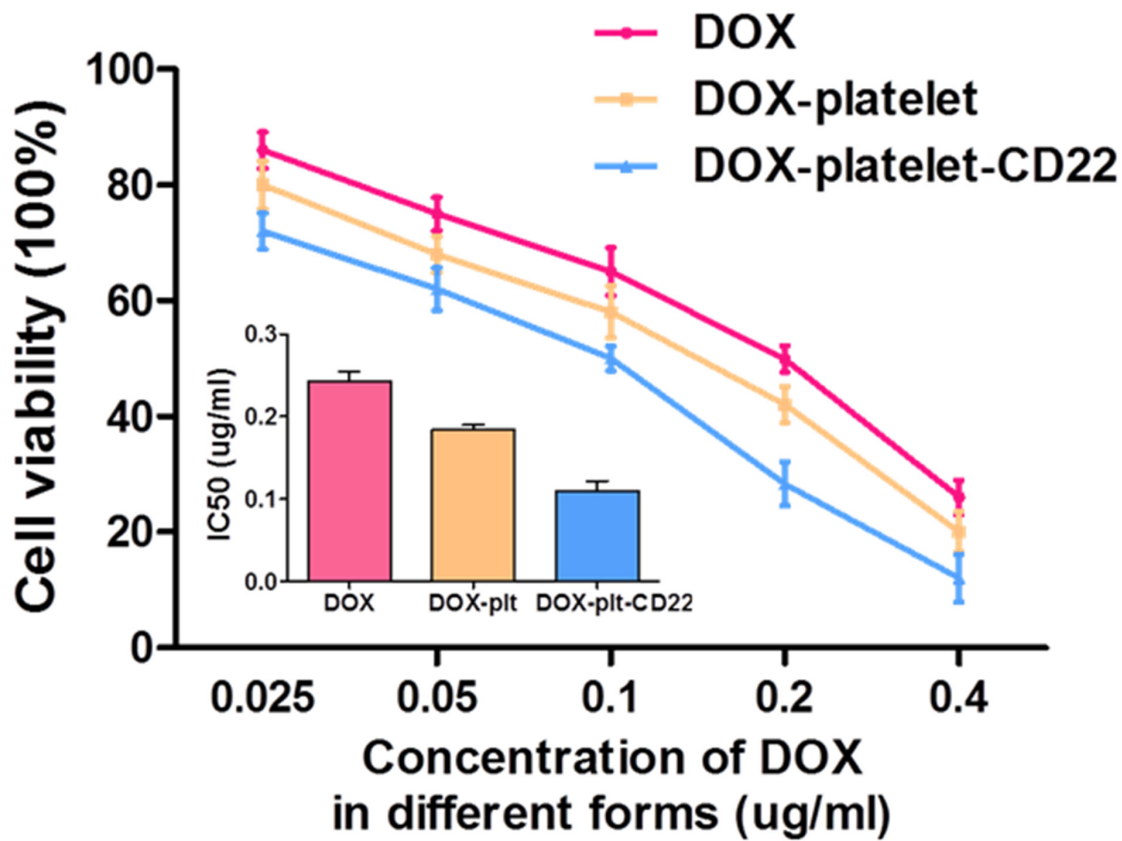

Supplementary Figure 3: The cytotoxic effect of DOX, DOX–platelet and DOX–platelet–CD22 against Raji cells with different concentration of DOX; Inset: The IC<sub>50</sub> of DOX in different forms for Raji cells. The IC<sub>50</sub> values for DOX, DOX–platelet, and DOX–platelet–CD22 are 0.242, 0.192, and 0.09 μg/mL, respectively.
